# Supplementary material for: Disruption of miRNA-mRNA Networks Defines Novel Molecular Signatures for Penile Carcinogenesis
Source: MDPI journal article supplement (doi:10.3390/cancers13194745), 2021-09-23
Supplement: s1 [file s1]

## Supplementary Material

**Table S1.** Taqman® Advanced miRNA Assays of the differentially expressed miRNAs (DEmiRs) selected for validation by qRT-PCR.

| Type                           | miRNA       | TaqMan® Advanced miRNA Assays |
|--------------------------------|-------------|-------------------------------|
| DEmiRs selected for validation | miR-432-5p  | 478101_mir                    |
|                                | miR-487b-3p | 477835_mir                    |
|                                | miR-30a-5p  | 479448_mir                    |
|                                | miR-149-5p  | 477917_mir                    |
|                                | miR-145-5p  | 477916_mir                    |
|                                | miR-200a-5p | 478752_mir                    |
|                                | miR-224-5p  | 477986_mir                    |
|                                | miR-31-3p   | 478012_mir                    |
|                                | miR-31-5p   | 478015_mir                    |
| Endogenous controls            | miR-103a-3p | 478253_mir                    |
|                                | miR-423-5p  | 478090_mir                    |

DEmiR: differentially expressed miRNA; qRT-PCR: quantitative Reverse Transcription Polymerase Chain Reaction.

**Table S2.** Complete list of the genes included in the panel (83 genes of interest and seven endogenous controls) used to evaluate transcript expression levels in all tumoral (N=24) and non-neoplastic (N=24) tissues from PeC patients.

| Gene symbol | Gene Name                                             | Classification     |
|-------------|-------------------------------------------------------|--------------------|
| ABCB1       | ATP binding cassette subfamily B member 1             | Gene of interest   |
| ACTB        | Actin Beta                                            | Endogenous control |
| AKT1        | AKT serine/threonine kinase 1                         | Gene of interest   |
| ALDH1A1     | aldehyde dehydrogenase 1 family member A1             | Gene of interest   |
| ATM         | ATM serine/threonine kinase                           | Gene of interest   |
| B2M         | Beta-2-Microglobulin                                  | Endogenous control |
| BAX         | BCL2 associated X, apoptosis regulator                | Gene of interest   |
| BBC3        | BCL2 binding component 3                              | Gene of interest   |
| BCL2        | BCL2, apoptosis regulator                             | Gene of interest   |
| CCND1       | cyclin D1                                             | Gene of interest   |
| CD274       | CD274 molecule                                        | Gene of interest   |
| CD44        | CD44 molecule (Indian blood group)                    | Gene of interest   |
| CDH1        | cadherin 1                                            | Gene of interest   |
| CDH2        | cadherin 2                                            | Gene of interest   |
| CDKN1A      | cyclin dependent kinase inhibitor 1A                  | Gene of interest   |
| CDKN2A      | cyclin dependent kinase inhibitor 2A                  | Gene of interest   |
| CEBPB       | CCAAT/enhancer binding protein beta                   | Gene of interest   |
| CXCR4       | C-X-C motif chemokine receptor 4                      | Gene of interest   |
| DKK1        | dickkopf WNT signaling pathway inhibitor 1            | Gene of interest   |
| DNMT1       | DNA methyltransferase 1                               | Gene of interest   |
| EGFR        | epidermal growth factor receptor                      | Gene of interest   |
| EGR1        | early growth response 1                               | Gene of interest   |
| ENTPD5      | ectonucleoside triphosphate diphosphohydrolase 5      | Gene of interest   |
| ESRP1       | epithelial splicing regulatory protein 1              | Gene of interest   |
| FGF2        | fibroblast growth factor 2                            | Gene of interest   |
| FOS         | Fos proto-oncogene, AP-1 transcription factor subunit | Gene of interest   |
| GADD45A     | growth arrest and DNA damage inducible alpha          | Gene of interest   |
| GAPDH       | Glyceraldehyde-3-Phosphate Dehydrogenase              | Endogenous control |
| GUSB        | Glucuronidase Beta                                    | Endogenous control |
| HIF1A       | hypoxia inducible factor 1 alpha subunit              | Gene of interest   |
| HOXA10      | homeobox A10                                          | Gene of interest   |
| HOXA9       | homeobox A9                                           | Gene of interest   |
| HPRT1       | Hypoxanthine Phosphoribosyltransferase 1              | Endogenous control |
| IGF1R       | insulin like growth factor 1 receptor                 | Gene of interest   |
| IL1A        | interleukin 1 alpha                                   | Gene of interest   |
| IL1B        | interleukin 1 beta                                    | Gene of interest   |

|          |                                                                   |                    |
|----------|-------------------------------------------------------------------|--------------------|
| IL6      | <i>interleukin 6</i>                                              | Gene of interest   |
| JUN      | <i>Jun proto-oncogene, AP-1 transcription factor subunit</i>      | Gene of interest   |
| KAT6A    | <i>lysine acetyltransferase 6A</i>                                | Gene of interest   |
| KLF4     | <i>Kruppel like factor 4</i>                                      | Gene of interest   |
| KMT2A    | <i>lysine methyltransferase 2A</i>                                | Gene of interest   |
| KMT2D    | <i>lysine methyltransferase 2D</i>                                | Gene of interest   |
| KRAS     | <i>KRAS proto-oncogene, GTPase</i>                                | Gene of interest   |
| LATS2    | <i>large tumor suppressor kinase 2</i>                            | Gene of interest   |
| LIN28A   | <i>lin-28 homolog A</i>                                           | Gene of interest   |
| MCM2     | <i>minichromosome maintenance complex component 2</i>             | Gene of interest   |
| MDM2     | <i>MDM2 proto-oncogene</i>                                        | Gene of interest   |
| MLH1     | <i>mutL homolog 1</i>                                             | Gene of interest   |
| MMP1     | <i>matrix metalloproteinase 1</i>                                 | Gene of interest   |
| MMP12    | <i>matrix metalloproteinase 12</i>                                | Gene of interest   |
| MMP9     | <i>matrix metalloproteinase 9</i>                                 | Gene of interest   |
| MYC      | <i>v-myc avian myelocytomatosis viral oncogene homolog</i>        | Gene of interest   |
| MYD88    | <i>myeloid differentiation primary response 88</i>                | Gene of interest   |
| NANOG    | <i>Nanog homeobox</i>                                             | Gene of interest   |
| NES      | <i>nestin</i>                                                     | Gene of interest   |
| NOTCH1   | <i>notch 1</i>                                                    | Gene of interest   |
| NOTCH4   | <i>notch 4</i>                                                    | Gene of interest   |
| NRP1     | <i>neuropilin 1</i>                                               | Gene of interest   |
| PEBP1    | <i>phosphatidylethanolamine binding protein 1</i>                 | Gene of interest   |
| PITX2    | <i>paired like homeodomain 2</i>                                  | Gene of interest   |
| PMAIP1   | <i>phorbol-12-myristate-13-acetate-induced protein 1</i>          | Gene of interest   |
| PPARGC1A | <i>PPARG coactivator 1 alpha</i>                                  | Gene of interest   |
| PTEN     | <i>phosphatase and tensin homolog</i>                             | Gene of interest   |
| Rb1      | <i>RB transcriptional corepressor 1</i>                           | Gene of interest   |
| RECK     | <i>reversion inducing cysteine rich protein with kazal motifs</i> | Gene of interest   |
| RHOA     | <i>ras homolog family member A</i>                                | Gene of interest   |
| RIPK3    | <i>receptor interacting serine/threonine kinase 3</i>             | Gene of interest   |
| RPLP0    | <i>Ribosomal Protein Lateral Stalk Subunit P0</i>                 | Endogenous control |
| SAV1     | <i>salvador family WW domain containing protein 1</i>             | Gene of interest   |
| SESN2    | <i>sestrin 2</i>                                                  | Gene of interest   |
| SFN      | <i>stratifin</i>                                                  | Gene of interest   |
| SNAIL1   | <i>snail family transcriptional repressor 1</i>                   | Gene of interest   |
| SNAIL2   | <i>snail family transcriptional repressor 2</i>                   | Gene of interest   |
| SOX2     | <i>SRY-box 2</i>                                                  | Gene of interest   |
| SRC      | <i>SRC proto-oncogene, non-receptor tyrosine kinase</i>           | Gene of interest   |

|          |                                                           |                    |
|----------|-----------------------------------------------------------|--------------------|
| STAT3    | <i>signal transducer and activator of transcription 3</i> | Gene of interest   |
| STK4     | <i>serine/threonine kinase 4</i>                          | Gene of interest   |
| TCF7L2   | <i>transcription factor 7like 2</i>                       | Gene of interest   |
| TFRC     | <i>Transferrin Receptor</i>                               | Endogenous control |
| TGFB1    | <i>transforming growth factor beta 1</i>                  | Gene of interest   |
| TIGAR    | <i>TP53 induced glycolysis regulatory phosphatase</i>     | Gene of interest   |
| TLR4     | <i>toll like receptor 4</i>                               | Gene of interest   |
| TNFRSF1A | <i>TNF receptor superfamily member 1A</i>                 | Gene of interest   |
| TP53     | <i>tumor protein p53</i>                                  | Gene of interest   |
| TP53I3   | <i>tumor protein p53 inducible protein 3</i>              | Gene of interest   |
| TP63     | <i>tumor protein p63</i>                                  | Gene of interest   |
| TWIST1   | <i>twist family bHLH transcription factor 1</i>           | Gene of interest   |
| VEGFA    | <i>vascular endothelial growth factor A</i>               | Gene of interest   |
| WNT5a    | <i>Wnt family member 5A</i>                               | Gene of interest   |
| ZEB1     | <i>zinc finger E-box binding homeobox 1</i>               | Gene of interest   |

---

**Table S3.** Total number of PeC patients included in the study and reasons for exclusion of 17 patients.

| <b>Patients of the study</b>             | <b>N</b> |
|------------------------------------------|----------|
| Number of PeC patients at ICESP          | 41       |
| Reasons for exclusion of patients        | 17       |
| Patient refused to sign informed consent | 2        |
| Patient refused penectomy                | 1        |
| Death before treatment                   | 3        |
| Advanced disease                         | 2        |
| Previous treatment for PeC               | 1        |
| HIV or HCV infection                     | 2        |
| Penectomy performed in another Hospital  | 2        |
| Insufficient material                    | 3        |
| Lost to follow-up                        | 1        |
| Total number of included patients        | 24       |

N: number of patients; ICESP: Instituto do Câncer do Estado de São Paulo; PeC: penile carcinoma; HIV: human immunodeficiency virus; HCV: hepatitis C virus.

**Table S4.** List of 69 DEmiRs identified by microarray analysis in the comparison between TT (N=11) and NNT (N=11) tissues.

| Reg            | DEmiR         | FC     | p       | FDR    | Reg          | DEmiR       | FC    | p       | FDR    |
|----------------|---------------|--------|---------|--------|--------------|-------------|-------|---------|--------|
| Downregulation | miR-432-5p    | -13.44 | <0.0001 | 0.0048 |              | miR-936     | 2.01  | <0.0001 | 0.0048 |
|                | miR-487b-3p   | -8.52  | 0.0001  | 0.0079 |              | miR-1184    | 2.15  | <0.0001 | 0.0056 |
|                | miR-139-5p    | -7.37  | <0.0001 | 0.0048 |              | miR-4721    | 2.16  | 0.0010  | 0.0458 |
|                | miR-497-5p    | -7.28  | <0.0001 | 0.0067 |              | miR-8073    | 2.18  | 0.0010  | 0.0451 |
|                | miR-509-3p    | -6.95  | 0.0003  | 0.0214 |              | miR-4322    | 2.23  | 0.0005  | 0.0298 |
|                | miR-30a-3p    | -6.81  | 0.0005  | 0.0289 |              | miR-6813-5p | 2.26  | 0.0003  | 0.0207 |
|                | miR-127-3p    | -6.46  | <0.0001 | 0.0048 |              | miR-4443    | 2.48  | 0.0010  | 0.0451 |
|                | miR-139-3p    | -6.38  | <0.0001 | 0.0048 |              | miR-18a-5p  | 2.61  | 0.0006  | 0.0322 |
|                | miR-382-5p    | -5.60  | 0.0006  | 0.0327 |              | miR-6768-5p | 2.67  | 0.0012  | 0.0492 |
|                | miR-145-5p    | -5.42  | 0.0001  | 0.0088 |              | miR-4640-5p | 2.82  | 0.0012  | 0.0490 |
|                | miR-379-5p    | -5.39  | <0.0001 | 0.0067 |              | miR-4539    | 2.90  | 0.0001  | 0.0107 |
|                | miR-125b-2-3p | -5.35  | 0.0001  | 0.0096 |              | miR-200a-5p | 2.93  | <0.0001 | 0.0048 |
|                | miR-196a-5p   | -5.10  | 0.0005  | 0.0308 | Upregulation | miR-21-3p   | 2.97  | 0.0001  | 0.0075 |
|                | miR-195-5p    | -4.93  | <0.0001 | 0.0064 |              | miR-3687    | 2.98  | <0.0001 | 0.0058 |
|                | miR-433-3p    | -4.92  | 0.0001  | 0.0079 |              | miR-7162-3p | 3.22  | 0.0001  | 0.0118 |
|                | miR-134-5p    | -4.89  | 0.0001  | 0.0095 |              | miR-25-5p   | 3.30  | <0.0001 | 0.0075 |
|                | miR-143-3p    | -4.88  | 0.0001  | 0.0107 |              | miR-1910-5p | 3.36  | 0.0001  | 0.0088 |
|                | miR-125b-5p   | -4.83  | <0.0001 | 0.0067 |              | miR-8064    | 3.68  | 0.0007  | 0.0368 |
|                | miR-30a-5p    | -4.67  | <0.0001 | 0.0067 |              | miR-4793-3p | 4.01  | 0.0011  | 0.0490 |
|                | miR-409-3p    | -4.67  | 0.0002  | 0.0141 |              | miR-183-5p  | 4.04  | 0.0012  | 0.0492 |
|                | miR-99a-5p    | -4.46  | 0.0002  | 0.0141 |              | miR-5195-3p | 4.73  | 0.0001  | 0.0124 |
|                | miR-100-5p    | -4.46  | 0.0002  | 0.0162 |              | miR-365b-5p | 4.77  | 0.0011  | 0.0467 |
|                | miR-485-5p    | -4.31  | <0.0001 | 0.0067 |              | miR-4485    | 5.75  | <0.0001 | 0.0033 |
|                | miR-214-3p    | -3.86  | <0.0001 | 0.0057 |              | miR-224-5p  | 6.56  | 0.0001  | 0.0083 |
|                | miR-149-5p    | -3.46  | 0.0006  | 0.0308 |              | miR-187-3p  | 8.19  | <0.0001 | 0.0048 |
|                | miR-10b-5p    | -3.31  | 0.0007  | 0.0368 |              | miR-4417    | 10.66 | 0.0001  | 0.0083 |
|                | miR-140-3p    | -3.17  | <0.0001 | 0.0048 |              | miR-31-3p   | 12.37 | <0.0001 | 0.0002 |
|                | miR-494-3p    | -2.95  | 0.0004  | 0.0247 |              | miR-31-5p   | 38.24 | <0.0001 | 0.0048 |
|                | miR-199a-5p   | -2.94  | 0.0002  | 0.0162 |              |             |       |         |        |
|                | miR-199a-3p   | -2.92  | 0.0003  | 0.0221 |              |             |       |         |        |
|                | miR-199b-3p   | -2.92  | 0.0003  | 0.0221 |              |             |       |         |        |
|                | miR-574-3p    | -2.75  | <0.0001 | 0.0048 |              |             |       |         |        |
|                | miR-126-3p    | -2.40  | 0.0002  | 0.0125 |              |             |       |         |        |
|                | let-7e-5p     | -2.38  | 0.0001  | 0.0111 |              |             |       |         |        |
|                | miR-378a-3p   | -2.33  | 0.0001  | 0.0090 |              |             |       |         |        |
|                | miR-26a-5p    | -2.31  | 0.0001  | 0.0111 |              |             |       |         |        |
|                | miR-378c      | -2.27  | 0.0013  | 0.0492 |              |             |       |         |        |
|                | let-7c-5p     | -2.21  | 0.0008  | 0.0405 |              |             |       |         |        |
|                | miR-500a-3p   | -2.19  | <0.0001 | 0.0056 |              |             |       |         |        |
|                | miR-361-5p    | -2.07  | 0.0010  | 0.0451 |              |             |       |         |        |
|                | miR-34a-5p    | -2.03  | 0.0004  | 0.0238 |              |             |       |         |        |

DEmiR: differentially expressed miRNA; TT: tumor tissue; NNT: non-neoplastic tissue; Reg: regulation; FC: fold change; FDR: false discovery rate

**Table S5.** Top ten enriched pathways of the experimentally validated target genes (weak or strong functional evidence) of the DEmiRs detected in the comparison between tumoral (N=24) and non-neoplastic (N=24) tissues according to miRTarBase 8.0 database.

| Regulation              | miRNA          | REACTOME ID   | Description                                | p-value  | FDR      | Genes                                                                                                                                                                                     | Count |
|-------------------------|----------------|---------------|--------------------------------------------|----------|----------|-------------------------------------------------------------------------------------------------------------------------------------------------------------------------------------------|-------|
| Downregulated<br>miRNAs | hsa-miR-145-5p | R-HSA-5663202 | Diseases of signal transduction            | 2,58E-11 | 1,45E-08 | CDKN1A, STAT1, IRS1, EGFR, MYC, IRS2, JAG1, NRAS, MDM2, ADAM17, HDAC2, KREMEN1, APH1A, BRAF, ACTB, SMAD3, TGFBR2, SMAD4, MAP3K11, ERBB4, ZFYVE9, CD28, HDAC11, FZD6, AGTRAP, HBEGF, SMAD2 | 27    |
|                         | hsa-miR-145-5p | R-HSA-2262752 | Cellular responses to stress               | 1,34E-04 | 3,95E-03 | CDKN1A, IFNB1, CDK4, VEGFA, MDM2, MAP2K6, EPAS1, ETS1, MAP2K4, SP1, CDK6, HMGA2, E2F3, RPS6KA3, NUP43, RPA1, HIF1A, HIST1H2BF                                                             | 18    |
|                         | hsa-miR-145-5p | R-HSA-2559583 | Cellular Senescence                        | 1,16E-05 | 5,93E-04 | CDKN1A, IFNB1, CDK4, MDM2, MAP2K6, ETS1, MAP2K4, SP1, CDK6, HMGA2, E2F3, RPS6KA3, HIST1H2BF                                                                                               | 13    |
|                         | hsa-miR-145-5p | R-HSA-9006936 | Signaling by TGF-beta family members       | 4,25E-06 | 3,89E-04 | MYC, SERPINE1, F11R, SMAD3, SMAD5, TGFBR2, SMAD4, SP1, ZFYVE9, SMAD2                                                                                                                      | 10    |
|                         | hsa-miR-145-5p | R-HSA-6785807 | Interleukin-4 and 13 signaling             | 7,12E-06 | 5,00E-04 | SOX2, MUC1, CDKN1A, STAT1, FSCN1, MYC, VEGFA, MMP1, NANOG, HIF1A                                                                                                                          | 10    |
|                         | hsa-miR-145-5p | R-HSA-8878166 | Transcriptional regulation by RUNX2        | 1,95E-05 | 9,14E-04 | CDKN1A, STAT1, YES1, CFBF, PPM1D, CDK4, ESR1, SOX9, SMAD4, SP7                                                                                                                            | 10    |
|                         | hsa-miR-145-5p | R-HSA-170834  | Signaling by TGF-beta Receptor Complex     | 1,91E-06 | 2,14E-04 | MYC, SERPINE1, F11R, SMAD3, TGFBR2, SMAD4, SP1, ZFYVE9, SMAD2                                                                                                                             | 9     |
|                         | hsa-miR-145-5p | R-HSA-8848021 | Signaling by PTK6                          | 1,75E-06 | 2,14E-04 | EGFR, CDK4, NRAS, EPAS1, ERBB4, HBEGF, HIF1A, PXN                                                                                                                                         | 8     |
|                         | hsa-miR-145-5p | R-HSA-9006927 | Signaling by Non-Receptor Tyrosine Kinases | 1,75E-06 | 2,14E-04 | EGFR, CDK4, NRAS, EPAS1, ERBB4, HBEGF, HIF1A, PXN                                                                                                                                         | 8     |
|                         | hsa-miR-145-5p | R-HSA-2219528 | PI3K/AKT Signaling in Cancer               | 8,74E-05 | 3,03E-03 | CDKN1A, IRS1, EGFR, IRS2, MDM2, ERBB4, CD28, HBEGF                                                                                                                                        | 8     |

Continuation of Table S5

| Regulation            | miRNA          | REACTOME ID   | Description                                                               | p-value  | FDR      | Genes                                                                                                                             | Count |
|-----------------------|----------------|---------------|---------------------------------------------------------------------------|----------|----------|-----------------------------------------------------------------------------------------------------------------------------------|-------|
| Upregulated<br>miRNAs | hsa-miR-31-5p  | R-HSA-194315  | Signaling by Rho GTPases                                                  | 6,61E-05 | 6,85E-03 | <i>RHOA, ARPC5, TIAM1, WASF3, HIST1H2BC, HIST1H2BK, FLNA, RANGAP1, HIST1H2BJ, SRC, YWHAE, RHOBTB1, NF2, AR, SYDE2, GNA13, SFN</i> | 17    |
|                       | hsa-miR-31-5p  | R-HSA-5663205 | Infectious disease                                                        | 3,82E-05 | 6,60E-03 | <i>MET, RPS7, NUP188, RPS4Y1, RPL37A, RANGAP1, SRC, ARF1, RPL35A, GTF2E1, CCNT1, RPL27A, RPL12, XRCC5, AP2B1, NPM1</i>            | 16    |
|                       | hsa-miR-31-5p  | R-HSA-195258  | RHO GTPase Effectors                                                      | 2,55E-04 | 9,44E-03 | <i>RHOA, ARPC5, WASF3, HIST1H2BC, HIST1H2BK, FLNA, RANGAP1, HIST1H2BJ, SRC, YWHAE, NF2, AR, SFN</i>                               | 13    |
|                       | hsa-miR-224-5p | R-HSA-5683057 | MAPK family signaling cascades                                            | 5,45E-05 | 7,66E-03 | <i>CDC42, PDGFRB, PEBP1, KRAS, TNRC6A, PAK2, PSMD3, NCOA3, XPO1, MAP2K2, RAC1</i>                                                 | 11    |
|                       | hsa-miR-31-5p  | R-HSA-927802  | Nonsense-Mediated Decay (NMD)                                             | 1,32E-04 | 9,44E-03 | <i>PPP2R2A, RPS7, RPS4Y1, RPL37A, SMG1, RPL35A, RPL27A, RPL12</i>                                                                 | 8     |
|                       | hsa-miR-31-5p  | R-HSA-975957  | Nonsense Mediated Decay (NMD) enhanced by the Exon Junction Complex (EJC) | 1,32E-04 | 9,44E-03 | <i>PPP2R2A, RPS7, RPS4Y1, RPL37A, SMG1, RPL35A, RPL27A, RPL12</i>                                                                 | 8     |
|                       | hsa-miR-31-5p  | R-HSA-8878166 | Transcriptional regulation by RUNX2                                       | 1,77E-04 | 9,44E-03 | <i>ITGA5, SATB2, CDK1, GLI2, SRC, SP7, AR, SMAD4</i>                                                                              | 8     |
|                       | hsa-miR-224-5p | R-HSA-5687128 | MAPK6/MAPK4 signaling                                                     | 1,48E-05 | 4,17E-03 | <i>CDC42, TNRC6A, PAK2, PSMD3, NCOA3, XPO1, RAC1</i>                                                                              | 7     |
|                       | hsa-miR-31-5p  | R-HSA-2682334 | EPH-Ephrin signaling                                                      | 1,91E-04 | 9,44E-03 | <i>RHOA, ARPC5, TIAM1, RASA1, SRC, AP2B1, EFNB1</i>                                                                               | 7     |
|                       | hsa-miR-31-5p  | R-HSA-69473   | G2/M DNA damage checkpoint                                                | 2,33E-04 | 9,44E-03 | <i>CDK1, HIST1H2BC, HIST1H2BK, RPA1, HIST1H2BJ, YWHAE, SFN</i>                                                                    | 7     |

FDR: false discovery rate; Pathways are provided by Reactome database for humans and are described separately for each type of regulation (downregulated or upregulated miRNAs).



**Table S6.** List of Gene Ontology (GO) enriched pathways of differentially expressed genes detected by Biomark HD Fluidigm platform in the comparison between tumoral (N=24) and non-neoplastic tissues (N=24).

| Description                                                | setSize | enrichment Score | NES   | pvalue | p.adjust | qvalues | rank | Leading edge                   | Core enrichment                                                                   |
|------------------------------------------------------------|---------|------------------|-------|--------|----------|---------|------|--------------------------------|-----------------------------------------------------------------------------------|
| GO RESPONSE TO GROWTH FACTOR                               | 13      | -0,74            | -2,02 | 0,00   | 0,14     | 0,14    | 9    | tags=54%, list=24%, signal=63% | <i>ZEB1, KLF4, EGR1, TWIST1, FOS, FGF2, PPARGC1A</i>                              |
| GO MUSCLE TISSUE DEVELOPMENT                               | 10      | -0,67            | -1,76 | 0,01   | 0,53     | 0,52    | 7    | tags=50%, list=19%, signal=56% | <i>EGR1, TWIST1, FOS, FGF2, PPARGC1A</i>                                          |
| GO CELLULAR RESPONSE TO ENDOGENOUS STIMULUS                | 13      | -0,63            | -1,74 | 0,01   | 0,53     | 0,52    | 12   | tags=54%, list=32%, signal=56% | <i>TLR4, ZEB1, KLF4, EGR1, FOS, FGF2, PPARGC1A</i>                                |
| GO DNA METABOLIC PROCESS                                   | 10      | -0,64            | -1,68 | 0,02   | 0,53     | 0,52    | 8    | tags=50%, list=22%, signal=54% | <i>KLF4, TWIST1, FOS, FGF2, PPARGC1A</i>                                          |
| GO PROTEOLYSIS                                             | 12      | 0,53             | 1,61  | 0,02   | 0,53     | 0,52    | 10   | tags=58%, list=27%, signal=63% | <i>MMP1, MMP12, SFN, VEGFA, MDM2, STAT3, RHOA</i>                                 |
| GO CIS REGULATORY REGION SEQUENCE SPECIFIC DNA BINDING     | 11      | -0,60            | -1,62 | 0,03   | 0,76     | 0,76    | 16   | tags=73%, list=43%, signal=59% | <i>TCF7L2, NANOG, PITX2, ZEB1, KLF4, EGR1, TWIST1, FOS</i>                        |
| GO TRANSCRIPTION REGULATOR ACTIVITY                        | 18      | -0,54            | -1,57 | 0,04   | 0,78     | 0,77    | 17   | tags=61%, list=46%, signal=64% | <i>KMT2A, TCF7L2, NANOG, PITX2, ZEB1, KLF4, EGR1, TWIST1, FOS, FGF2, PPARGC1A</i> |
| GO DNA BINDING TRANSCRIPTION FACTOR ACTIVITY               | 13      | -0,57            | -1,56 | 0,05   | 0,78     | 0,77    | 17   | tags=69%, list=46%, signal=58% | <i>KMT2A, TCF7L2, NANOG, PITX2, ZEB1, KLF4, EGR1, TWIST1, FOS</i>                 |
| GO RESPONSE TO ENDOGENOUS STIMULUS                         | 15      | -0,56            | -1,59 | 0,05   | 0,78     | 0,77    | 14   | tags=53%, list=38%, signal=56% | <i>BCL2, TLR4, ZEB1, KLF4, EGR1, FOS, FGF2, PPARGC1A</i>                          |
| GO CHROMATIN                                               | 14      | -0,55            | -1,53 | 0,06   | 0,78     | 0,77    | 16   | tags=64%, list=43%, signal=59% | <i>TCF7L2, NANOG, PITX2, ZEB1, KLF4, EGR1, TWIST1, FOS, PPARGC1A</i>              |
| GO TRANSITION METAL ION BINDING                            | 10      | 0,53             | 1,56  | 0,06   | 0,78     | 0,77    | 3    | tags=30%, list=8%, signal=38%  | <i>MMP1, IL1A, MMP12</i>                                                          |
| GO RESPONSE TO ORGANIC CYCLIC COMPOUND                     | 10      | -0,56            | -1,47 | 0,07   | 0,82     | 0,82    | 8    | tags=40%, list=22%, signal=43% | <i>KLF4, EGR1, FOS, PPARGC1A</i>                                                  |
| GO SEQUENCE SPECIFIC DNA BINDING                           | 16      | -0,53            | -1,51 | 0,08   | 0,82     | 0,82    | 17   | tags=69%, list=46%, signal=65% | <i>KMT2A, TCF7L2, NANOG, BCL2, PITX2, ZEB1, KLF4, EGR1, TWIST1, FOS, PPARGC1A</i> |
| GO NUCLEAR CHROMOSOME                                      | 15      | -0,53            | -1,49 | 0,08   | 0,85     | 0,84    | 16   | tags=60%, list=43%, signal=57% | <i>TCF7L2, NANOG, PITX2, ZEB1, KLF4, EGR1, TWIST1, FOS, PPARGC1A</i>              |
| GO POSITIVE REGULATION OF MULTICELLULAR ORGANISMAL PROCESS | 18      | -0,50            | -1,45 | 0,09   | 0,85     | 0,84    | 9    | tags=39%, list=24%, signal=57% | <i>ZEB1, KLF4, EGR1, TWIST1, FOS, FGF2, PPARGC1A</i>                              |

Pathways provided by Gene Ontology (GO) database (p < 0.1)

**Table S7.** List of the 69 DEmiRs detected in the comparison of tumoral and non-neoplastic tissues in the microarray analysis with opposite expression levels relative to that of the 37 DEGs described as experimentally validated according to miRTarBase 8.0

| DEGs            | DEmiRs                                                                                                         |
|-----------------|----------------------------------------------------------------------------------------------------------------|
| <i>ABCB1</i>    | -                                                                                                              |
| <i>ALDH1A1</i>  | -                                                                                                              |
| <i>BCL2</i>     | miR-18a-5p, miR-224-5p*                                                                                        |
| <i>CCND1</i>    | miR-18a-5p, miR-21-3p, miR-183-5p, miR-224-5p*, miR-6768-5p                                                    |
| <i>EGR1</i>     | miR-183-5p                                                                                                     |
| <i>FGF2</i>     | miR-936                                                                                                        |
| <i>FOS</i>      | miR-4640-5p                                                                                                    |
| <i>HOXA9</i>    | miR-18a-5p                                                                                                     |
| <i>IL1A</i>     | miR-30a-5p*                                                                                                    |
| <i>KAT6A</i>    | -                                                                                                              |
| <i>KLF4</i>     | -                                                                                                              |
| <i>KMT2A</i>    | miR-6813-5p                                                                                                    |
| <i>LATS2</i>    | miR-31-5p*, miR-183-5p                                                                                         |
| <i>MCM2</i>     | miR-145-5p*                                                                                                    |
| <i>MDM2</i>     | miR-4793-3p                                                                                                    |
| <i>MLH1</i>     | miR-31-5p*, miR-4793-3p                                                                                        |
| <i>MMP1</i>     | miR-145-5p*                                                                                                    |
| <i>MMP12</i>    | miR-145-5p*                                                                                                    |
| <i>NANOG</i>    | miR-8073                                                                                                       |
| <i>NRP1</i>     | -                                                                                                              |
| <i>PEBP1</i>    | miR-224-5p*                                                                                                    |
| <i>PITX2</i>    | -                                                                                                              |
| <i>PPARGC1A</i> | miR-8064                                                                                                       |
| <i>PTEN</i>     | miR-18a-5p, miR-21-3p, miR-200a-5p*                                                                            |
| <i>RECK</i>     | miR-183-5p                                                                                                     |
| <i>RHOA</i>     | miR-31-3p*, miR-31-5p*, miR-4640-5p, miR-4721                                                                  |
| <i>RIPK3</i>    | -                                                                                                              |
| <i>SAV1</i>     | -                                                                                                              |
| <i>SFN</i>      | -                                                                                                              |
| <i>STAT3</i>    | miR-21-3p, miR-365b-5p                                                                                         |
| <i>STK4</i>     | miR-18a-5p, miR-4793-3p                                                                                        |
| <i>TCF7L2</i>   | -                                                                                                              |
| <i>TLR4</i>     | -                                                                                                              |
| <i>TP53</i>     | miR-18a-5p                                                                                                     |
| <i>TWIST1</i>   | -                                                                                                              |
| <i>VEGFA</i>    | miR-126-3p, miR-134-5p, miR-145-5p*, miR-195-5p, miR-199a-3p, miR-199a-5p, miR-361-5p, miR-378a-3p, miR-497-5p |
| <i>ZEB1</i>     | miR-183-5p                                                                                                     |

DEmiR: differentially expressed miRNA; DEG: differentially expressed gene; \*DEmiRs detected in microarray analysis and validated by qRT-PCR

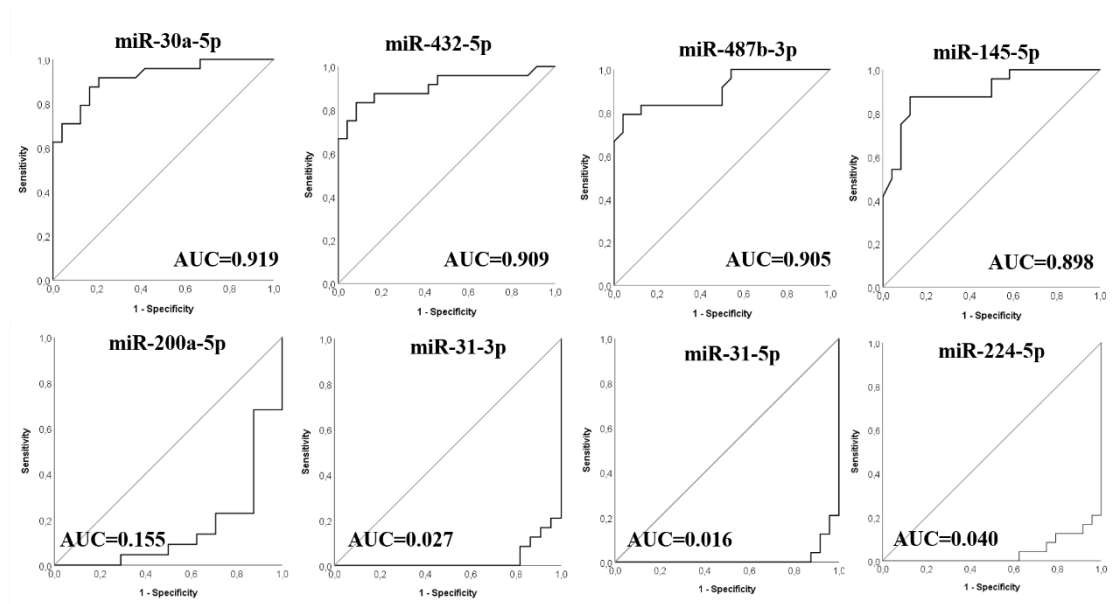

**Figure S1.** ROC curves of the eight differentially expressed miRNAs (DEmiRs) validated by qRT-PCR. All downregulated DEmiRs (miR-30a-5p, miR-432-5p, miR-487b-3p and miR-145-5p) demonstrated to have good accuracy to discriminate tumoral from non-neoplastic tissues in PeC patients; ROC: receiver operating characteristic; AUC: area under the curve.

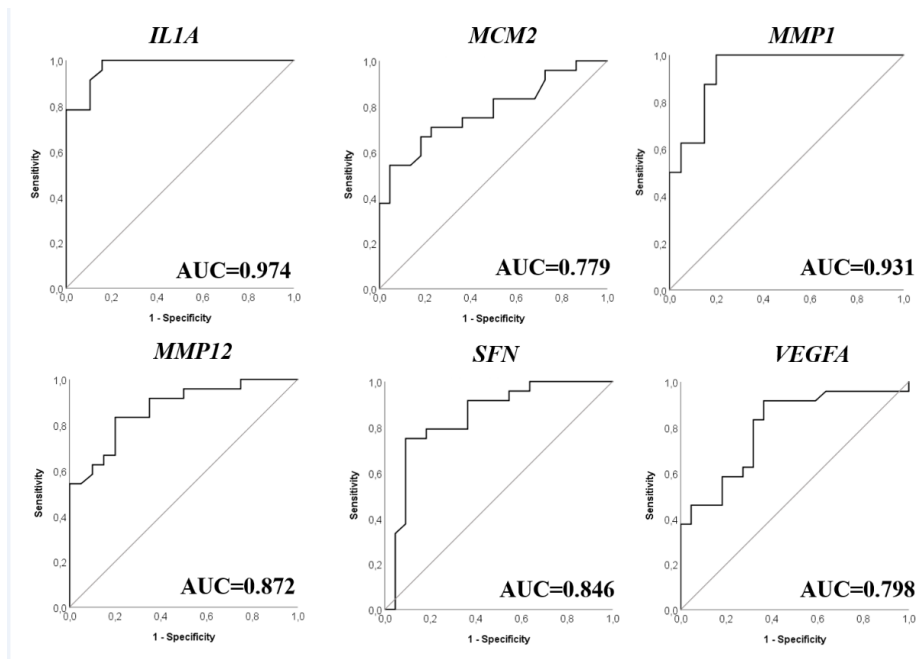

**Figure S2.** ROC curves of differentially expressed genes (DEGs) that demonstrated to have good accuracy to discriminate tumoral from non-neoplastic tissues (*IL1A*, *MCM2*, *MMP1*, *MMP12*, *SFN* and *VEGFA*) in PeC patients; ROC: receiver operating characteristic; AUC: area under the curve.

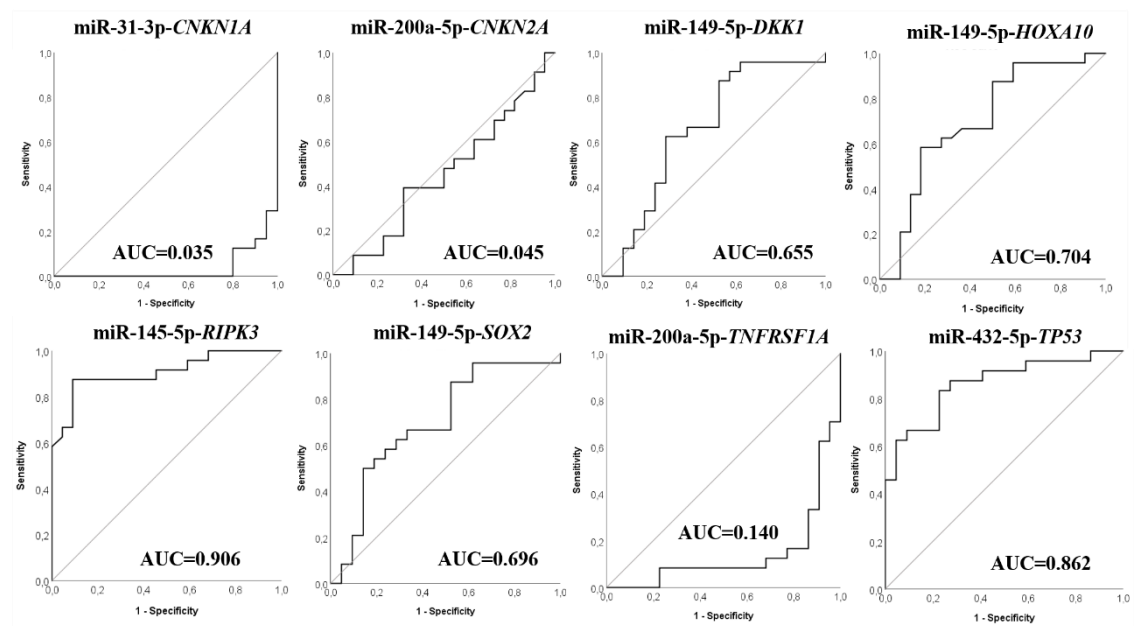

**Figure S3.** Eight miRNA-mRNA pairs disrupted in the penile carcinogenesis and their respective ROC curves to analyze accuracy in discriminating tumoral from non-neoplastic tissues; ROC: receiver operating characteristic; AUC: area under the curve.
